\*We have taken the below table from: Tong A, Sainsbury P, Craig J. Consolidated criteria for reporting qualitative research (COREQ): a 32-item checklist for interviews and focus groups. *Int J Qual Health Care* 2007;19(6):349-57.

\*We have placed an "x" beside the items to which we have reflected on (along with a page number) and have placed a "\*" beside the items to which we will reflect on continually during data collection, analysis, and writing.

**Table 1** Consolidated criteria for reporting qualitative studies (COREQ): 32-item checklist

| No                                             | Item                                          | Guide questions/description                                                                                                                                     |
|------------------------------------------------|-----------------------------------------------|-----------------------------------------------------------------------------------------------------------------------------------------------------------------|
| <b>Domain 1: Research team and reflexivity</b> |                                               |                                                                                                                                                                 |
| Personal Characteristics                       |                                               |                                                                                                                                                                 |
|                                                | * 1. Interviewer/facilitator                  | Which author/s conducted the interview or focus group?                                                                                                          |
| p. 8                                           | x 2. Credentials                              | What were the researcher's credentials? <i>E.g. PhD, MD</i>                                                                                                     |
| p. 8                                           | x 3. Occupation                               | What was their occupation at the time of the study?                                                                                                             |
|                                                | * 4. Gender                                   | Was the researcher male or female?                                                                                                                              |
| p. 8                                           | x 5. Experience and training                  | What experience or training did the researcher have?                                                                                                            |
| Relationship with participants                 |                                               |                                                                                                                                                                 |
|                                                | * 6. Relationship established                 | Was a relationship established prior to study commencement?                                                                                                     |
|                                                | * 7. Participant knowledge of the interviewer | What did the participants know about the researcher? <i>e.g. personal goals, reasons for doing the research</i>                                                 |
| p. 8                                           | x * 8. Interviewer characteristics            | What characteristics were reported about the interviewer/facilitator? <i>e.g. Bias, assumptions, reasons and interests in the research topic</i>                |
| <b>Domain 2: study design</b>                  |                                               |                                                                                                                                                                 |
| Theoretical framework                          |                                               |                                                                                                                                                                 |
| p. 5                                           | x 9. Methodological orientation and Theory    | What methodological orientation was stated to underpin the study? <i>e.g. grounded theory, discourse analysis, ethnography, phenomenology, content analysis</i> |
| Participant selection                          |                                               |                                                                                                                                                                 |
| p. 6                                           | x 10. Sampling                                | How were participants selected? <i>e.g. purposive, convenience, consecutive, snowball</i>                                                                       |
| p. 6                                           | x 11. Method of approach                      | How were participants approached? <i>e.g. face-to-face, telephone, mail, email</i>                                                                              |
| p. 6                                           | x 12. Sample size                             | How many participants were in the study?                                                                                                                        |
|                                                | * 13. Non-participation                       | How many people refused to participate or dropped out? Reasons?                                                                                                 |
| Setting                                        |                                               |                                                                                                                                                                 |
| p. 6                                           | x 14. Setting of data collection              | Where was the data collected? <i>e.g. home, clinic, workplace</i>                                                                                               |
| p. 6                                           | x 15. Presence of non-participants            | Was anyone else present besides the participants and researchers?                                                                                               |
| p. 6                                           | x * 16. Description of sample                 | What are the important characteristics of the sample? <i>e.g. demographic data, date</i>                                                                        |
| Data collection                                |                                               |                                                                                                                                                                 |
| p. 7                                           | x 17. Interview guide                         | Were questions, prompts, guides provided by the authors? Was it pilot tested?                                                                                   |
|                                                | * 18. Repeat interviews                       | Were repeat interviews carried out? If yes, how many?                                                                                                           |
| p. 6                                           | x 19. Audio/visual recording                  | Did the research use audio or visual recording to collect the data?                                                                                             |
|                                                | * 20. Field notes                             | Were field notes made during and/or after the interview or focus group?                                                                                         |
| p. 6                                           | x 21. Duration                                | What was the duration of the interviews or focus group?                                                                                                         |
| p. 6, 8                                        | x 22. Data saturation                         | Was data saturation discussed?                                                                                                                                  |
|                                                | * 23. Transcripts returned                    | Were transcripts returned to participants for comment and/or correction?                                                                                        |
| <b>Domain 3: analysis and findingsz</b>        |                                               |                                                                                                                                                                 |
| Data analysis                                  |                                               |                                                                                                                                                                 |
|                                                | * 24. Number of data coders                   | How many data coders coded the data?                                                                                                                            |
|                                                | * 25. Description of the coding tree          | Did authors provide a description of the coding tree?                                                                                                           |
| p. 8                                           | x 26. Derivation of themes                    | Were themes identified in advance or derived from the data?                                                                                                     |
| p. 8                                           | x 27. Software                                | What software, if applicable, was used to manage the data?                                                                                                      |
|                                                | * 28. Participant checking                    | Did participants provide feedback on the findings?                                                                                                              |
| Reporting                                      |                                               |                                                                                                                                                                 |
|                                                | * 29. Quotations presented                    | Were participant quotations presented to illustrate the themes / findings? Was each quotation identified? <i>e.g. participant number</i>                        |
|                                                | * 30. Data and findings consistent            | Was there consistency between the data presented and the findings?                                                                                              |
|                                                | * 31. Clarity of major themes                 | Were major themes clearly presented in the findings?                                                                                                            |
|                                                | * 32. Clarity of minor themes                 | Is there a description of diverse cases or discussion of minor themes?                                                                                          |
